# Membrane voltage fluctuations in human breast cancer cells

Peter Quicke<sup>1,2</sup>, Yilin Sun<sup>1,3</sup>, Mar Arias-Garcia<sup>3</sup>, Corey D. Acker<sup>4</sup>, Mustafa B. A. Djamgoz<sup>5</sup>, Chris Bakal<sup>3</sup>, and Amanda J. Foust<sup>1\*</sup>

<sup>1</sup>Imperial College London, Department of Bioengineering, London, SW7 2AL, United Kingdom

<sup>2</sup>The Francis Crick Institute, London, NW1 1AT, United Kingdom

<sup>3</sup>Institute of Cancer Research, Cancer Biology, London, SW3 6JB, United Kingdom

<sup>4</sup>University of Connecticut School of Medicine, R. D. Berlin Center for Cell Analysis and Modeling, Farmington, CT, 06030, USA

<sup>5</sup>Imperial College London, Department of Life Sciences, London, SW7 2AZ, United Kingdom

\*a.foust@imperial.ac.uk

## ABSTRACT

Cancer cells feature a resting membrane potential ( $V_m$ ) that is depolarized compared to normal cells, and express active ionic conductances, which factor directly in their pathophysiological behavior. Despite similarities to ‘excitable’ tissues, relatively little is known about cancer cell  $V_m$  dynamics. With high-throughput, cellular-resolution  $V_m$  imaging, we characterized  $V_m$  fluctuations of hundreds of human triple-negative breast cancer MDA-MB-231 cells and compared to non-cancerous breast epithelial MCF-10A cells. By quantifying their Dynamic Electrical Signatures (DESs) through an unsupervised machine-learning protocol, we identified four classes ranging from “noisy” to “blinking/waving”. The  $V_m$  of MDA-MB-231 cells exhibited spontaneous, transient hyperpolarizations that were inhibited by the voltage-gated sodium channel blocker tetrodotoxin. The  $V_m$  of MCF-10A cells was comparatively static, but fluctuations increased following treatment with transforming growth factor- $\beta$ 1, a canonical inducer of the epithelial-to-mesenchymal transition. These data suggest that the ability to generate  $V_m$  fluctuations is acquired during transformation and may participate in oncogenesis.

## Introduction

All cells in the body exhibit a voltage difference ( $V_m$ ) across the plasma membrane and use this to regulate a wide range of functions such as gene expression, secretion, and whole-cell motility. Cellular  $V_m$  at rest varies both between and within cell types. Interestingly, whilst this is ca. -70 mV in mature ‘quiescent’ cells, including nerves and muscles, it is noticeably depolarized ( $V_m \sim -50$  to -10 mV) in proliferating cells, including cancer cells and stem cells<sup>1,2</sup>.

$V_m$  fluctuates dramatically, both spontaneously and in response to stimuli, in classically excitable tissues such as heart, muscle and nerve, which support the generation and conduction of action potentials. The resting  $V_m$  of several cell types has been shown to fluctuate<sup>3</sup>. These include cells with rhythmic activity e.g. neurons controlling respiration<sup>4</sup>, arterial vasomotion<sup>5</sup>, biological ‘clocks’<sup>6</sup> and sleep<sup>7,8</sup>. Oscillations of  $V_m$  also manifest in pathophysiological situations such as epilepsy and neuronal degeneration, and can extend to network effects<sup>9,10</sup>.

In several carcinomas, functional expression of voltage-gated sodium channels (VGSCs) promotes the metastatic process<sup>11</sup>. Treating carcinoma cells in vitro with VGSC blockers partially suppresses 3D invasion<sup>12,13</sup>. The most specific inhibitor of

26 VGSCs is tetrodotoxin (TTX), which blocks the channel by binding to a site within the channel pore when the channel is in the  
27 open state<sup>14</sup>. TTX reduces invasion in carcinoma cells in-vitro, and this effect is abolished by siRNA silencing of the VGSC  
28 Nav1.5 in-vivo<sup>12,13,15,16</sup>. Gradek et al. recently demonstrated that reduced expression of SIK1 induces Nav1.5 expression,  
29 invasion and the expression of EMT-associated transcription factor SNAI1<sup>17</sup>. However, as noted above, the steady-state resting  
30  $V_m$  of human breast cancer cells relative to normal epithelia is strongly depolarized<sup>18</sup>. In the case of the MDA-MB-231 cells,  
31 derived from a highly aggressive triple-negative breast cancer,  $V_m$  rests between -40 mV to -20 mV<sup>15,19,20</sup>. The  $V_m$ -dependent  
32 inactivation of VGSCs means that the majority of channels should be permanently inactivated at such depolarized membrane  
33 potentials and therefore insensitive to TTX. Nevertheless, TTX has been shown repeatedly to inhibit the invasiveness of these  
34 cells and several other carcinomas<sup>11,15,19,21-24</sup>, potentially by blocking the persistent window current<sup>19,25</sup>.

35 Although the depolarization of resting  $V_m$  and the enriched VGSC expression in aggressive cancer cell lines are established  
36 (reviewed by<sup>2</sup> and<sup>26</sup>), unlike classical excitable tissues (e.g., heart, muscle, nerve), comparatively little is known about cancer's  
37  $V_m$  dynamics. Studies utilizing multi-electrode arrays detected  $V_m$  fluctuations but could not to attribute them to individual  
38 cells<sup>27,28</sup>. Here in contrast we captured cellular-resolution, spatially resolved  $V_m$  dynamics in human breast cancer cells with  
39 a fast, electrochromic voltage-sensitive dye, enabling optical monitoring of  $V_m$  changes in hundreds of cells simultaneously.  
40 Through an unsupervised machine learning protocol, we classified and characterized the Dynamic Electrical Signatures (DESS)  
41 of the cellular  $V_m$  time series obtained with high-throughput imaging. A subset of MDA-MB-231 breast cancer cells exhibited  
42 hyperpolarizing "blinks" and "waves", in contrast with the quiescent, static  $V_m$  of non-tumorigenic MCF-10A cells. Application  
43 of TTX suppressed the  $V_m$  fluctuations in MDA-MB-231 cells whilst treatment of MCF-10A cells with transforming growth  
44 factor- $\beta$ 1 (TGF- $\beta$ ), which stimulates the epithelial-to-mesenchymal transition (EMT), induced  $V_m$  fluctuations in these cells.  
45 Taken together, these data suggest that the ability to generate  $V_m$  fluctuations is acquired during the EMT and may participate in  
46 oncogenesis.

## 47 Results

### 48 Di-4-AN(F)EP(F)PTEA fluorescence ratio linearly reports change in $V_m$

49 We imaged the membrane potential of cultured cell monolayers with extracellularly-applied di-4-AN(F)EP(F)PTEA<sup>29</sup>, a dye  
50 that inserts into the outer membrane leaflet, shifting its absorption and emission spectra as a function of membrane potential  
51 with sub-microsecond temporal fidelity. We sequentially excited the dye with blue and green light-emitting diodes (LEDs,  
52 Figure 1A,B; Supplementary Figure S1), taking the ratio of fluorescence excited by each color at each point in time and dividing

53 by the baseline ratio ( $\Delta R/R_0$ ). A change in  $V_m$  causes the fluorescence excited by each color to change in opposite directions  
54 (Figure 1C), amplifying the corresponding change in the ratio. The ratiometric imaging scheme also partially mitigates the  
55 confounds of uneven dye labeling, photobleaching decay, and mechanical motion<sup>30</sup>. This approach enabled us to image the  
56 dynamics of hundreds of human breast cancer cells simultaneously with cellular resolution.

57 We first verified that the fluorescence ratio ( $\Delta R/R_0$ ) linearly reported changes in  $V_m$ . By imaging Di-4-AN(F)EP(F)PTEA  
58 fluorescence while stepping  $V_m$  through a range of values in whole-cell voltage clamp of MDA-MB-231 cells, we observed  
59 that the ratio of blue-to-green Di-4-AN(F)EP(F)PTEA fluorescence varied linearly with changes in  $V_m$  over a physiological  
60 range of  $V_m$  ranging from  $-60$  to  $+30$  mV. The slope of  $\Delta R/R_0$  vs  $V_m$  showed an average sensitivity of  $5.1 \pm 0.43$  % per 100 mV  
61 (mean  $\pm$  standard error of the mean, (s.e.m.);  $n = 12$  cells; Figure 1D-G). Furthermore, as expected, global depolarization of all  
62 cells on the coverslip by washing in a high-potassium (100 mM) extracellular solution also increased  $\Delta R/R_0$  (Supplementary  
63 Figure S2). These results show that the ratio  $\Delta R/R_0$  faithfully reports  $V_m$  changes in subsequent recordings of spontaneous  $V_m$   
64 fluctuations (Figure 1H).

### 65 Cellular-resolution membrane voltage fluctuations in MDA-MB-231 cells

66 A subset of MDA-MB-231 cells exhibited fluctuating  $V_m$ . We imaged spontaneous  $V_m$  fluctuations at 5 frames/second in  
67 cultured monolayers of the highly aggressive triple-negative breast cancer cell line MDA-MB-231 (Figure 2A).  $6.84\% \pm 0.97\%$   
68 ( $n=22$  coverslips) of cells on each coverslip displayed a fluctuating  $V_m$  (Figure 2B,C). The great majority ( $>90\%$ ,  $91/100$ )  
69 of high signal-to-noise ratio, large amplitude ( $>|1.5\%| \Delta R/R_0$ ) events were negative-going ("-VE", Figure 2B). Therefore,  
70 subsequent analyses focus on the -VEs (Figure 2A, B). Most cells exhibited few or no fluctuations, but a subset of cells were  
71 highly active (Figure 2C, see also supplementary Movie M1). Among the active cells, events were detected at an average  
72 frequency of  $2 \pm 0.2$  events/cell/1000 seconds ( $n= 20$  coverslips, Figure 2D).

73 We then sought to describe the "Dynamic Electrical Signature" (DES) of individual cells based on their  $V_m$  imaging time  
74 series. A DES is a multi-parametric feature vector which captures various aspects of  $V_m$  fluctuations over time such as power  
75 spectral properties, successive differences, and entropy. A DES captures variations beyond the event-based metrics and can be  
76 used to classify patterns based on their similarity. To describe the DESs, we implemented an unsupervised machine learning  
77 pipeline (Figure 3). The Cellular DES Pipeline uses the Catch-22 algorithm<sup>31</sup> to extract features from individual  $V_m$  traces.  
78 Feature extraction and hierarchical clustering on the "active" cellular time series, those in which  $V_m$  fluctuations were detected  
79 (287 out of 2993, Figure 3A-C), yielded silhouette coefficients indicating that the time series clustered into 3 or 4 classes

80 (Figure 3D). Manual inspection of the time series revealed higher inner-cluster similarity with 4 clusters. We named the DES  
81 classes identified by the 4 cluster classification: small blinking (blinking-S), waving, noisy, and large blinking (blinking-L).  
82 Figure 4 displays exemplar time series from each class. Cells of the four classes were observed simultaneously in the imaged  
83 fields-of-view (FOVs). Together these four DES classes describe the temporal heterogeneity of  $V_m$  fluctuations in MDA-MB-231  
84 cells.

### 85 **TTX decreases $V_m$ fluctuations in MDA-MB-231 cells**

86 To assess the role of VGSC activity in the DES of MDA-MB-231 cells, we treated cultures with tetrodotoxin (TTX), a potent  
87 and specific inhibitor of VGSCs<sup>14</sup>. The ability of electrochromic dyes to report the effects of TTX is well established<sup>32</sup>.  
88 TTX decreased the frequency of  $V_m$  fluctuations, especially of large amplitude hyperpolarizations (-VEs, Figure 5A,B), in a  
89 dose-dependent manner. In particular, 10  $\mu$ M TTX decreased the mean event rate by  $\sim 4$ x, from  $9.5 \times 10^{-5}$  to  $1.97 \times 10^{-5}$   
90 events/cell/s ( $p < 10^{-6}$ , one-sided bootstrapped significance test on the mean negative event rate per cell; Figure 5C). 1  $\mu$ M TTX  
91 decreased the mean event rate by a lesser factor of  $\sim 2$ x, from  $1.04 \times 10^{-4}$  to  $4.99 \times 10^{-5}$  events/cell/s ( $p = 0.019$ , one-sided  
92 bootstrapped significance test on the mean negative event rate per cell; Figure 5D). The effect of TTX on event frequency  
93 recovered following washout (10  $\mu$ M TTX; Figure 5E). For the feature-based analysis, projection of active TTX-treated  
94 MDA-MB-231 cells onto the active untreated cells' PC space did not reveal DES class differentiation with TTX (Supplemental  
95 Figure S3).

### 96 **$V_m$ dynamics in MCF-10A cells**

97 To assess the impact of MDA-MB-231's cancerous, aggressive phenotype on  $V_m$  dynamics, we compared its  $V_m$  dynamics to  
98 that of non-tumorigenic MCF-10A cells (Figure 6A,C). Applying the same imaging protocol, we observed that only a small  
99 subset ( $0.46\% \pm 0.14\%$ ,  $n = 12$  coverslips) of MCF-10A cells exhibited  $V_m$  fluctuations compared to MDA-MB-231 cells  
100 ( $6.84\% \pm 0.97\%$ ,  $n=22$  coverslips, Figure 6E). Interestingly, incubation of the cells in TGF- $\beta$ 1 (5 ng/mL), a growth factor  
101 known to stimulate EMT, increased the percentage of cells exhibiting  $V_m$  fluctuations to  $0.81\% \pm 0.19\%$  ( $n = 13$  coverslips,  
102 Figure 6B,D). With TGF- $\beta$ , the mean -VE rate increased from  $2.85 \times 10^{-6}$  to  $1.4 \times 10^{-5}$  events/cell/s ( $p = 0.000567$ , one sided  
103 bootstrap difference of means at the cell level, Figure 6C-E).

104 Visualization of the MCF-10A cells' normalized features in 2D PC space shows separation of DESs between TGF- $\beta$ -treated  
105 and untreated MCF-10A cells (Figure 6F). In particular, 7/27 untreated MCF-10A cells and 9/33 TGF- $\beta$  treated MCF-10A  
106 cells fell outside of the decision boundary of the best linear separator (Figure 6F, dashed line). In a feature space combining

107 MDA-MB-231 DESs and MCF-10A DESs, the MCF-10A DESs co-localized over a range of MDA-MB-231 DES classes in  
108 2D PC space, while TGF- $\beta$  treatment increased localization with large-amplitude  $V_m$  “waving” MDA-MB-231 cells in the  
109 combined PC space (Figure 6G). In summary, TGF- $\beta$  treatment increased the similarity of MCF-10A  $V_m$  dynamics with the  
110 large-amplitude “waving” MDA-MB-231 DES class.

### 111 **MDA-MB-231 cells $V_m$ event synchrony**

112 We observed temporal correlations between events occurring in simultaneously imaged MDA-MB-231 cells. Pairwise  
113 comparison of cellular  $V_m$  time series revealed a mixture of synchronous and asynchronous events (Figure 7A), indicating  
114 that these temporal correlations were not caused by optical crosstalk. To assess whether the  $V_m$  event temporal correlations  
115 occurred at rates significantly above chance, we generated event rasters for  $V_m$  transients detected in time bins ranging from  
116 1-100 seconds (Figure 7B, showing 10 second bins). We then calculated the pairwise Pearson correlation coefficient (PCC) for  
117 all cells in each FOV. We compared the mean PCC for the cells to the PCC of randomly shuffled rasters, which preserved the  
118 cellular event statistics but destroyed any inter-cell temporal correlations. PCC increased overall with bin size as expected,  
119 and the PCC for the real event rasters was significantly greater than the PCC of the scrambled rasters for all bins sizes (Figure  
120 7C). This result indicates a significant inter-cell temporal correlation of MDA-MB-231  $V_m$  events, above that which would be  
121 observed by chance for such events randomly distributed in time.

122 In one instance we observed a wave of transient depolarizations propagating through a subset of cells unidirectionally  
123 across the FOV (Figure 8). The slope of the line fit to the distance as a function of hyperpolarization peak time from the first  
124 active cell shows a propagation speed of 27  $\mu\text{m/s}$  (Figure 8B, supplementary Movie M2).

## 125 **Discussion**

126 The high-throughput, cellular-resolution imaging data indicate that  $V_m$  fluctuates dynamically  $\sim 7\%$  of highly aggressive,  
127 triple-negative MDA-MB-231 breast cancer cells. Both the event-based and feature-based analyses indicated that the most  
128 stereotypical of these events were transient hyperpolarizing “blinks” and “waves.” These events featured significant inter-cellular  
129 temporal correlation. Application of TTX decreased the dynamic  $V_m$  activity in MDA-MB-231 cells. The  $V_m$  of non-cancerous  
130 MCF-10A breast epithelial cells was comparatively static. Treatment with TGF- $\beta$  increased  $V_m$  fluctuations in the MCF-10A  
131 cells and increased the feature-based similarity of their temporal fluctuations to those of MDA-MB-231 cells.

132 Whole-cell patch-clamp is the gold-standard for absolute  $V_m$  measurement. This technique measured that the steady-state  
133 resting  $V_m$  of human breast cancer cells is strongly depolarized relative to normal epithelia<sup>15, 18–20</sup>. Relatively little, however,

134 had been reported on spontaneous  $V_m$  dynamics in human breast cells. Whole-cell current-clamp could in principle detect  $V_m$   
135 fluctuations, but this has not been reported to date. It is possible that dialysis of the intracellular space by the patch pipette  
136 washes out or dampens the molecular machinery underlying the  $V_m$  fluctuations. Moreover, the low throughput of patch-clamp  
137 recording could hinder detection of the heterogeneous DESs exhibited by only approximately 1 in 20 cells.

138 Our detection of  $V_m$  fluctuations in subsets of MDA-MB-231 and MCF-10A cells was enabled by the novel application and  
139 adaptation of electrochromic voltage dye imaging. Critically, our approach enabled monitoring of spontaneous  $V_m$  fluctuations  
140 in hundreds of cells simultaneously at single-cell resolution. Electrochromic dyes track  $V_m$  with sub-microsecond temporal  
141 fidelity<sup>33</sup>, but are also phototoxic, which limits the exposure duration, rate, and total imaging time (3 ms exposures at 5 Hz  
142 over 920 seconds in our case). In the future, utilization of probes based on other mechanisms such as photo-induced electron  
143 transfer<sup>34</sup>, or transfection with fluorescent protein-based genetically-encoded voltage indicators (GEVIs)<sup>35</sup>, may increase the  
144 total imaging time and/or rate. In the case of GEVIs, however, photon budget is often limited by photobleaching, a problem  
145 addressed by newly-developed chemigenetic sensors<sup>36</sup>. Our ratiometric excitation scheme reduced imaging artefacts due to  
146 photobleaching, and variations in concentration and volume. It is important to note that voltage dye intensity reports relative  
147 changes in  $V_m$ , not absolute  $V_m$ . A second limitation of our analysis is that to remove the effects of bleaching and cell movement,  
148 we temporally high pass filter our  $V_m$  traces before analysis via division by the 1000 point rolling average of the time course.  
149 This filter precluded detection of activity varying on timescales slower than approximately 0.01 Hz.

150 A spiking, TTX-sensitive  $V_m$  phenotype was recently described in MDA-MB-231 cells through extracellular multi-electrode  
151 array (MEA) recording<sup>28</sup>. In this study, each large area (2 mm<sup>2</sup>) electrode aggregated signals from 100s of cells, enabling the  
152 detection of rare spiking events from pooled populations. While our 5 Hz imaging rate could not capture the “fast spiking”  
153 (lasting 10s of milliseconds) activity described by this study, it is possible that the “square-shaped” pulses (lasting up to 7  
154 seconds) the authors detected arise from the same  $V_m$  dynamics reported as blinking/waving in our  $V_m$  image series. Our  
155 imaging methodology complements high temporal-resolution MEA recordings by enabling, for the first time, high throughput  
156 cellular-resolution localization of  $V_m$  fluctuations, necessary to detect spatiotemporal patterns, e.g., intercellular  $V_m$  wave  
157 propagation (Figure 8). The high throughput of  $V_m$  imaging demonstrated here opens a new window onto the ‘electro-excitable’  
158 pathophysiology of cancer.

159 Roughly 7% of MDA-MB-231 cells demonstrated transient fluctuations in  $V_m$ . The large amplitude events were hyperpo-  
160 larizing ‘blinks’ and ‘waves’. This observation appears in stark contrast to classically excitable tissues like brain, heart, and  
161 muscle that have a resting  $V_m$  close to the reversal potential for  $K^+$ , and which depolarize through the conductance  $Na^+$  and/or

162  $\text{Ca}^{2+}$  when excited<sup>14</sup>. Resting MDA-MB-231 cells exhibit a relatively depolarized  $V_m$ , owing at least in part to a  $\text{Na}^+$  ‘window  
163 current’ conducted by Nav1.5<sup>19,25,37</sup>. The large negative-going events imply that  $\text{K}^+$  (possibly  $\text{Cl}^-$ ) conductance transiently  
164 increases, or that  $\text{Na}^+$  conductance transiently decreases, hyperpolarizing  $V_m$  toward the Nernst potential of  $\text{K}^+$ . Moreover,  
165 the transient hyperpolarizations could be coupled to  $\text{Ca}^{2+}$  fluctuations<sup>38</sup> through  $\text{Ca}^{2+}$ -activated  $\text{K}^+$  channels, e.g. KCa3.1  
166 preferentially expressed in metastatic breast tumors<sup>39</sup>. Future studies can elucidate the interplay between  $\text{Ca}^{2+}$  and  $V_m$  through  
167 simultaneous calcium and voltage imaging, and by pharmacological or genetic manipulation of KCa conductance during  $V_m$   
168 imaging.

169 TTX drastically reduced hyperpolarizing transient (-VE) frequency in MDA-MB-231 cells. In the presence of TTX, blockade  
170 of persistent  $\text{Na}^+$  currents hyperpolarizes resting  $V_m$  in MDA-MB-231 cells<sup>37</sup>. Resting  $V_m$  hyperpolarization would decrease the  
171 driving force for the conductance of the transient hyperpolarizing current which could account, at least partially, for the reduction  
172 of transient hyperpolarizations we detected in the presence of TTX. Further work with e.g. ion channel pharmacological agents  
173 and gene silencing is required to elucidate the channels and currents mediating the transient hyperpolarizations observed here.  
174 Such experiments require the measurement of absolute membrane potential, which could be enabled optically through  $V_m$   
175 fluorescence lifetime imaging (VF-FLIM)<sup>40,41</sup>. However, current VF-FLIM implementations have a temporal resolution  $<0.5$   
176 Hz and therefore unable to track the rapid fluctuations characterized here.

177 The heterogeneity of the  $V_m$  fluctuations concurs with the heterogeneous VGSC expression in these cells<sup>15</sup>. The largest  
178 amplitude fluctuations were transient hyperpolarizing “blinks” and “waves”. These hyperpolarizations could directly modulate  
179 the amplitude of the “window” current conducted by Nav1.5<sup>19,25</sup>, changing intracellular  $\text{Na}^+$  concentration and downstream  
180  $\text{Na}^+$ -modulated signaling pathways, e.g. SIK<sup>17</sup>. A primary function of the VGSC activity in these cells is controlling proteolysis  
181 via pericellular acidification driven by sodium-hydrogen exchange (NHE1)<sup>42,43</sup>. The fact that the hyperpolarizing  $V_m$ -driven  
182 VGSC activity would occur intermittently in the cells would be suggestive of the following. First, it could ensure (i) better control  
183 of the proteolysis, i.e. invasion. Second, it would prevent excessive influx of  $\text{Na}^+$  into cells and possible osmotic imbalance  
184 that could compromise cell viability<sup>44</sup>. Further work is required to evaluate the potential mechanisms and consequences of  $V_m$   
185 fluctuations.

186 Our results support the notion that fluctuating  $V_m$  is related to cancer cell aggressiveness. First, it was much more common  
187 in the strongly metastatic MDA-MB-231 cells compared with ‘normal’ breast epithelial MCF-10A cells. Second, blocking  
188 VGSC activity dampened the  $V_m$  fluctuations. Third, conversely, the dynamic activity of  $V_m$  in MCF-10A cells increased after  
189 treatment with TGF- $\beta$  known to induce aggressive behaviour in these cells<sup>45</sup>. In the future, the  $V_m$  imaging can be exploited

190 further to determine, at a cell-by-cell level, the correlative and causal relationships between  $V_m$  behavior and metastatic and  
191 structural phenotypes.

## 192 **Methods**

### 193 **Cell culture**

194 We cultured MDA-MB-231 cells in high glucose DMEM (Life technologies 41966029) supplemented with 5% FBS (Sigma,  
195 #F7524) and Penicillin-streptomycin (Sigma, #P4333). For imaging, we plated 10k – 30k cells on 12 mm collagen-coated glass  
196 coverslips (rat tail collagen, Sigma, #122-20). Cells were plated the afternoon prior to imaging. Imaging was performed in  
197 phenol red-free Liebovitz's L-15 medium (Thermo fisher, #21083027), except during the high- $K^+$  control experiments where  
198 mammalian physiological saline (MPS) was used instead (described below).

199 MCF-10A cells were obtained from ATCC. They were cultured in DMEM/F12 (GIBCO, #31331) supplemented with 5%  
200 Horse Serum (GIBCO, #16050), 10  $\mu$ g/ml insulin (Sigma, #I-1882), 20 ng/ml Epidermal Growth Factor (Sigma, #E-9644), 100  
201 ng/ml cholera toxin (Sigma, #C-8052), 500 ng/ml hydrocortisone (Sigma, #H-0888) and 100 mg/ml penicillin/ streptomycin  
202 (GIBCO, #15070). Cells were confirmed to be mycoplasma-negative (e-Myco Mycoplasma PCR Detection Kit, iNtRON  
203 Biotechnology). Passage was carried out using 0.25% trypsin-EDTA (GIBCO) followed by centrifugation (1000 rpm, 4 min)  
204 and resuspension in complete medium. Some sets of MCF-10A cells were cultured in Transforming Growth Factor- $\beta$ 1 (TGF- $\beta$ ;  
205 Peprotech, #100-21) at 5 ng/mL in complete media for 48 - 169 hours to drive EMT.

### 206 **Imaging**

207 We prepared a 200  $\mu$ M stock solution of the electrochromic voltage dye di-4-AN(F)EP(F)PTEA<sup>29</sup> (100 nmol aliquots, Poten-  
208 tiometric Probes) in L-15 solution. Stock solution was kept for a maximum of 2 days after dissolving. Immediately prior to  
209 imaging, we gently washed the coverslip-adhered cells three times with warmed L-15 before placing them under the microscope.  
210 The coverslip was weighted in place with a tantalum ring and submerged in the dye diluted in L-15 to a final concentration  
211 of 3  $\mu$ M. The cells rested in this configuration for 15 minutes before imaging. During imaging, cells were maintained at a  
212 temperature between 30C-37C by a home-made open-loop water perfusion system or by a closed-loop heated chamber platform  
213 (TC-324C, PM-1, Warner Instruments).

214 Our custom-built widefield epifluorescence microscope formed an image of the cells through a 25x 1.0 NA upright  
215 water dipping objective (XLPLN25XSVM, Olympus) and 180 mm focal length tube lens (TTL180-A) onto a scientific  
216 complementary metal-oxide-semiconductor (sCMOS) camera (Orca Flash 4 v2, Hamamatsu). Imaging was performed with



217 two-color sequential excitation and imaged in a single spectral channel. Fluorescence was ratiometrically excited in two  
218 channels resulting in opposite direction voltage signals in the collected emission (Figure 1C). LEDs were driven using a Cairn  
219 OptoLed (P1110/002/000). The first channel illuminated with 405 nm LED (Cairn P1105/405/LED), filtered with a 405/10 nm  
220 bandpass (Semrock LD01-405/10), and combined with a 495 nm long pass dichroic (Semrock FF495-DI03) and an additional  
221 496 nm long pass (Semrock FF01-496/LP). The second channel illuminated with a 530 nm LED (Cairn P1105/530/LED),  
222 filtered with 520/35 nm filter (Semrock FF01-520/35), and combined with a 562 nm longpass dichroic (Semrock FF562-DI03).  
223 Emission was collected through a 650/150 nm bandpass filter (Semrock FF01-650/150) onto the sCMOS camera (Figure 1A).  
224 Images were acquired in Micromanager 2<sup>46</sup> with the Orca Flash 4's 'slow scan' mode, using the global shutter and frame  
225 reset with 4x4 digital binning. Imaging was performed at 5 Hz. During every image period, a 3-millisecond-exposure frame  
226 illuminated with each LED was acquired in rapid succession (Supplemental Figure S1). Illumination intensities for each  
227 channel were approximately matched between each channel and adjusted to give a signal intensity of around 4000 counts/pixel  
228 in labelled cell membranes. Intensities were typically between 0.1 and 1.3 mW/mm<sup>2</sup> for the blue excitation and 1.5 and 3.4  
229 mW/mm<sup>2</sup> for the green excitation.

## 230 **Imaging Protocols**

231 We acquired each trial, consisting of sequences of 10,000 frames (5,000 dual color-excited acquisitions) at different locations  
232 on the coverslip. Imaging locations were selected from confluent areas (median 975 cells/mm<sup>2</sup>, interquartile range 605, 1247  
233 cells / mm<sup>2</sup>). We acquired between 1 and 6 trials per coverslip, with each trial occurring in a distinct location. In tetrodotoxin  
234 (TTX) experiments, we first imaged 1-2 control trials without TTX ('pre' trials). We then added 1 mM of TTX citrate (Abcam,  
235 ab120055) in PBS stock solution to the imaging medium to achieve the a final concentration of 1 or 10 μM. 1-4 trials were  
236 imaged in the presence of TTX ('post' trials). For certain 10 μM TTX experiments, following 1-2 trials acquired in the presence  
237 of TTX, we replaced the TTX-containing medium with regular dye-containing L-15 medium and imaged 1-2 trials in this  
238 condition ('washout').

239 High potassium wash-in trials were conducted in mammalian physiological saline (MPS<sup>38</sup>), consisting of (in mM): 144  
240 NaCl, 5.4 KCl, 5.6 D-Glucose, 5 HEPES, 1 MgCl<sub>2</sub>, 2.5 CaCl<sub>2</sub>. Mid-trial, a high-potassium solution was washed in to depolarise  
241 the cells for validation of the voltage dye function. This solution was osmotically balanced consisting of (in mM): 49.4 NaCl,  
242 100 KCl, 5.6 D-Glucose, 5 HEPES, 1 MgCl<sub>2</sub>, 2.5 CaCl<sub>2</sub>.

## 243 Patch-clamp voltage dye calibration

244 We assessed the range of fluorescence change expected for known changes in  $V_m$  through whole-cell voltage-clamp and  
245 simultaneous voltage imaging. Cells were imaged in phenol red-free Liebovitz's L-15 medium at room temperature. Healthy,  
246 dye-labelled cells were selected and patched with pipettes between 3 and 10 M $\Omega$ . The pipette contained an Ag/AgCl bathed in  
247 intracellular solution (in mM): 130 K-Gluconate, 7 KCl, 4 ATP - Mg, 0.3 GTP - Na, 10 Phosphocreatine - Na, 10 HEPES.  
248 Voltage-clamp signals were amplified with a Multiclamp 700B (Molecular Devices) and digitized with Power 1401 (Cambridge  
249 Electronic Design) using Spike2 version X.

250 Ratiometric imaging was performed as described above, but at an increased rate of 100 frames/second. During each imaging  
251 trial,  $V_m$  was clamped for 1 s epochs at values varying between  $-60$  to  $+30$  mV in 10 mV increments. Fluorescent time courses  
252 were extracted from a cellular region of interest (ROI) around the patched cell for both excitation channels. The trials were  
253 bleach-corrected and converted to  $\Delta F/F_0$  using a linear fit to their time course. We calculated the average blue to green excited  
254 frame ratio ( $\Delta R/R_0$ ) across trials at each holding potential. A line was fit to  $\Delta R/R_0$  vs  $V_m$ . The line gradient reflects the  
255 sensitivity of  $\Delta R/R_0$  to  $V_m$  (% change per 100 mV) for each cell (n=12 cells).

## 256 Image Processing

257 All data analysis was performed in Python 3 using NumPy<sup>47</sup>, SciPy<sup>48</sup>, TiffFile, Scikit-image<sup>49</sup>, Scikit-learn<sup>50</sup> and Pandas<sup>51</sup>.  
258 Figures were generated using Matplotlib<sup>52</sup>. The analysis code is available at [https://github.com/peql0/cancer\\_](https://github.com/peql0/cancer_vs_d)  
259 [vsd](https://github.com/peql0/cancer_vs_d). Our dual-color excitation scheme generated image time series interleaving blue and green light-excited frames (Figure  
260 2A). We subtracted the constant dark value from each frame and separated the time series into two color channels. We applied a  
261 pixel-wise high pass filter, rejecting signals slower than 0.01 Hz, to the separated time series. In particular, slowly varying  
262 signals (mainly bleaching) were removed from each channel by dividing the stacks pixel-wise by a temporally filtered version of  
263 themselves. The filter was a uniform filter of length 1000 points. The filter was symmetric (i.e. time point  $t_0$  affected by points  
264  $t > t_0$  and  $t < t_0$  equally). These filter-normalised time series were then divided, blue frames by green frames, to find the ratio  
265 image for each time point (Figure 2A). Cells were segmented using CellPose<sup>53</sup>, using the default cytoplasmic segmentation  
266 model and approximate cellular diameter of 30 pixels. Additional segmentations of active cells that the Cellpose network did  
267 not identify were added by hand. The segmented ROIs were eroded with a single (1-round of binary) before extracting the ROI  
268 time courses to suppress the effects of movement at the cell edges. For each eroded ROI, we calculated the median of the pixel  
269 values at each time point. The mean of the time courses was subtracted and offset so that they were symmetric about 1.

## 270 **Event detection**

271 We implemented an event detection algorithm to identify significant changes to  $\Delta R/R_0$  reflecting the fluctuation of  $V_m$ . We  
272 first calculated the time course of the intra-ROI pixel-wise standard deviation for each eroded ROI. We filtered the median  
273 (calculated as above) and standard deviation time courses with a  $\sigma = 3$  point (i.e. 0.6 s) Gaussian filter.  $V_m$  fluctuation events  
274 were identified when the temporally filtered median pixel value diverged from 1, its time average value, by more than 2.5  
275 times the temporally filtered standard deviation (Figure 1H). Short events were removed and neighbouring events merged by 2  
276 iterations of binary opening and then 2 rounds of binary closing on the detected event array. Where events consisted of positive-  
277 and negative-going  $\Delta R/R_0$ , they were split into entirely positive going and entirely negative going events.

## 278 **Time series and event inclusion criteria**

279 Cells were considered dying/dead and excluded from analysis where the raw pixel values increased in brightness by more than  
280 25% during the acquisition in the blue channel, indicating loss of membrane polarization. Events arising from non-voltage  
281 related changes in brightness were identified as simultaneous events and excluded from the analysis. In the MCF-10A image  
282 series, where events were very rare, imaging artefacts were identified and excluded where more than 3 events overlapped by  
283 more than 30% in time. In MDA-MB-231 data, events were excluded where more than 5 events overlapped by more than 50%  
284 in time. Following event detection, all active cell time series were then evaluated by visual inspection of processed videos to  
285 reject events caused by floating dust, focal shifts, or other apparent imaging artefacts. Events satisfying both the automated and  
286 manual quality-control measures were analysed for event frequency, polarity, amplitude and duration.

287 In the feature-based analysis, we only included trials that completed the full 920 s imaging period (18279 out of 18752), and  
288 then applied the event detection algorithm described above to identify “active” cells (982 out of 18279). We then excluded all  
289 time series containing apparent imaging artefacts (dust, etc.). Following quality control and event detection, 297 MDA-MB-231,  
290 28 MCF-10A, and 33 MCF-10A+TGF- $\beta$  time series were admitted to the feature-based analysis pipeline described below  
291 (Figure 3A,B).

## 292 **$V_m$ time series clustering analysis**

293 Complementing the event-based analysis, we developed the Cellular DES Pipeline to classify the ROI-extracted time series  
294 according to its most salient dynamic features extracted by the Catch-22 algorithm<sup>31</sup>. The analysis realized with the Cellular  
295 DES Pipeline provides insight into the time series characteristics beyond simple event detection and quantification, enabling  
296 classification of the heterogeneous  $V_m$  dynamics into like clusters.

297 From the admitted time series, we extracted 22 features from each cellular ROI's median time series with the Catch-22  
298 algorithm (Figure 3C). After plotting the distribution of the individual features, around 80% (259/324) of cells shared the  
299 same value for the feature corresponding to the first minimum of the automutual information function, which we subsequently  
300 excluded from the feature list. We rescaled the raw feature values for the remaining 21 features between 0.0001 and 1 and  
301 applied the Box Cox transformation to normalize their distributions. We then rescaled the normalized values to between 0 and  
302 1 to ensure equal weighting into the clustering algorithms. To evaluate the number of Dynamic Electrical Signature (DES)  
303 classes, we implemented hierarchical clustering and Gaussian Mixture Modeling (GMM) on the 21 normalized features. Both  
304 clustering algorithms generated clusters with silhouette coefficients, which measure subtype dissimilarity<sup>54</sup>, decreasing to their  
305 lowest levels between 5 and 6 clusters (Figure 3D). Based on these silhouette scores and on visual inspection of the time series,  
306 we chose to sort the time series into four types as this resulted in the most homogeneous classes. Based on the general pattern  
307 of each type, we named the DES classes: small blinking (blinking-s), waving, noisy and large blinking (blinking-l).

308 To select exemplar time-series from each DES class (Figure 4), we performed Principal components analysis (PCA) and  
309 visualized the four classes in a 2-dimensional feature space. Each feature cluster occupies a unique area of the PC space. To  
310 identify exemplar time series of each type, we calculated the components of each feature and drew a vector for each feature's  
311 coefficients of PC1 and PC2 (Figure 4). These vectors therefore point to the type exhibiting the corresponding features most  
312 saliently. To identify exemplar time series from each type, we sorted the time series according to the feature whose vector  
313 points to that type.

## 314 Data Availability

315 The imaging and electrophysiological datasets generated and analysed during the current study are available from the corre-  
316 sponding author on reasonable request.

## 317 References

- 318 1. Levin, M. Large-scale biophysics: ion flows and regeneration. *Trends Cell Biol.* **17**, 261–270, DOI: [10.1016/j.tcb.2007.04.](https://doi.org/10.1016/j.tcb.2007.04.007)  
319 [007](https://doi.org/10.1016/j.tcb.2007.04.007) (2007).
- 320 2. Yang, M. & Brackenbury, W. J. Membrane potential and cancer progression. *Front. Physiol.* **4**, DOI: [10.3389/fphys.2013.](https://doi.org/10.3389/fphys.2013.00185)  
321 [00185](https://doi.org/10.3389/fphys.2013.00185) (2013).

- 322 **3.** Wilson, C. J., Higgs, M. H., Simmons, D. V. & Morales, J. C. Oscillations and spike entrainment. *F1000Research* **7**, 1960,  
323 DOI: [10.12688/f1000research.16451.1](https://doi.org/10.12688/f1000research.16451.1) (2018).
- 324 **4.** Ghali, M. G. Z. Respiratory rhythm generation and pattern formation: oscillators and network mechanisms. *J. Integr.*  
325 *Neurosci.* **18**, 481, DOI: [10.31083/j.jin.2019.04.188](https://doi.org/10.31083/j.jin.2019.04.188) (2019).
- 326 **5.** Cole, W. C., Gordon, G. R. & Braun, A. P. Cellular and ionic mechanisms of arterial vasomotion. In *Advances in*  
327 *Experimental Medicine and Biology*, 297–312, DOI: [10.1007/978-981-13-5895-1\\_12](https://doi.org/10.1007/978-981-13-5895-1_12) (Springer Singapore, 2019).
- 328 **6.** Allen, C. N., Nitabach, M. N. & Colwell, C. S. Membrane currents, gene expression, and circadian clocks. *Cold Spring*  
329 *Harb. Perspectives Biol.* **9**, a027714, DOI: [10.1101/cshperspect.a027714](https://doi.org/10.1101/cshperspect.a027714) (2017).
- 330 **7.** Steriade, M., McCormick, D. A. & Sejnowski, T. J. Thalamocortical oscillations in the sleeping and aroused brain. *Science*  
331 **262**, 679–685, DOI: [10.1126/science.8235588](https://doi.org/10.1126/science.8235588) (1993).
- 332 **8.** Destexhe, A. & Sejnowski, T. J. *Thalamocortical Assemblies: How Ion Channels, Single Neurons and Large-Scale*  
333 *Networks Organize Sleep Oscillations*. (Oxford University Press, USA, 2001). ISBN : 0198524250.
- 334 **9.** Nimmrich, V., Draguhn, A. & Axmacher, N. Neuronal network oscillations in neurodegenerative diseases. *NeuroMolecular*  
335 *Medicine* **17**, 270–284, DOI: [10.1007/s12017-015-8355-9](https://doi.org/10.1007/s12017-015-8355-9) (2015).
- 336 **10.** Lévesque, M., Salami, P., Shiri, Z. & Avoli, M. Interictal oscillations and focal epileptic disorders. *Eur. J. Neurosci.* **48**,  
337 2915–2927, DOI: [10.1111/ejn.13628](https://doi.org/10.1111/ejn.13628) (2017).
- 338 **11.** Djamgoz, M. B. A., Fraser, S. P. & Brackenbury, W. J. In vivo evidence for voltage-gated sodium channel expression in  
339 carcinomas and potentiation of metastasis. *Cancers* **11**, 1675, DOI: [10.3390/cancers11111675](https://doi.org/10.3390/cancers11111675) (2019).
- 340 **12.** Driffort, V. *et al.* Ranolazine inhibits NaV1.5-mediated breast cancer cell invasiveness and lung colonization. *Mol. Cancer*  
341 **13**, DOI: [10.1186/1476-4598-13-264](https://doi.org/10.1186/1476-4598-13-264) (2014).
- 342 **13.** Nelson, M., Yang, M., Dowle, A. A., Thomas, J. R. & Brackenbury, W. J. The sodium channel-blocking antiepileptic drug  
343 phenytoin inhibits breast tumour growth and metastasis. *Mol. Cancer* **14**, DOI: [10.1186/s12943-014-0277-x](https://doi.org/10.1186/s12943-014-0277-x) (2015).
- 344 **14.** Hille, B. *Ionic channels of excitable membranes / Bertil Hille*. (Sinauer Associates, Sunderland, Mass, 1992), second  
345 edition. edn.
- 346 **15.** Fraser, S. P. *et al.* Voltage-gated sodium channel expression and potentiation of human breast cancer metastasis. *Clin.*  
347 *Cancer Res.* **11**, 5381–5389, DOI: [10.1158/1078-0432.ccr-05-0327](https://doi.org/10.1158/1078-0432.ccr-05-0327) (2005).

- 348 **16.** Guzel, R. M., Ogmen, K., Ilieva, K. M., Fraser, S. P. & Djamgoz, M. B. A. Colorectal cancer invasiveness in vitro:  
349 Predominant contribution of neonatal nav1.5 under normoxia and hypoxia. *J. Cell. Physiol.* **234**, 6582–6593, DOI:  
350 [10.1002/jcp.27399](https://doi.org/10.1002/jcp.27399) (2018).
- 351 **17.** Gradek, F. *et al.* Sodium channel nav1.5 controls epithelial-to-mesenchymal transition and invasiveness in breast cancer  
352 cells through its regulation by the salt-inducible kinase-1. *Sci. Reports* **9**, DOI: [10.1038/s41598-019-55197-5](https://doi.org/10.1038/s41598-019-55197-5) (2019).
- 353 **18.** Marino, A. A. *et al.* Association between cell membrane potential and breast cancer. *Tumor Biol.* **15**, 82–89, DOI:  
354 [10.1159/000217878](https://doi.org/10.1159/000217878) (1994).
- 355 **19.** Roger, S., Besson, P. & Guennec, J.-Y. L. Involvement of a novel fast inward sodium current in the invasion capacity of a  
356 breast cancer cell line. *Biochimica et Biophys. Acta (BBA) - Biomembr.* **1616**, 107–111, DOI: [10.1016/j.bbamem.2003.07.](https://doi.org/10.1016/j.bbamem.2003.07.001)  
357 [001](https://doi.org/10.1016/j.bbamem.2003.07.001) (2003).
- 358 **20.** Berzingi, S., Newman, M. & Yu, H.-G. Altering bioelectricity on inhibition of human breast cancer cells. *Cancer Cell Int.*  
359 **16**, DOI: [10.1186/s12935-016-0348-8](https://doi.org/10.1186/s12935-016-0348-8) (2016).
- 360 **21.** Brackenbury, W. J. & Djamgoz, M. B. A. Activity-dependent regulation of voltage-gated nachannel expression in mat-LyLu  
361 rat prostate cancer cell line. *The J. Physiol.* **573**, 343–356, DOI: [10.1113/jphysiol.2006.106906](https://doi.org/10.1113/jphysiol.2006.106906) (2006).
- 362 **22.** Roger, S. *et al.* Voltage-gated sodium channels potentiate the invasive capacities of human non-small-cell lung cancer cell  
363 lines. *The Int. J. Biochem. & Cell Biol.* **39**, 774–786, DOI: [10.1016/j.biocel.2006.12.007](https://doi.org/10.1016/j.biocel.2006.12.007) (2007).
- 364 **23.** Hernandez-Plata, E. *et al.* Overexpression of NaV1.6 channels is associated with the invasion capacity of human cervical  
365 cancer. *Int. J. Cancer* **130**, 2013–2023, DOI: [10.1002/ijc.26210](https://doi.org/10.1002/ijc.26210) (2011).
- 366 **24.** Campbell, T. M., Main, M. J. & Fitzgerald, E. M. Functional expression of the voltage-gated sodium channel, nav1.7,  
367 underlies epidermal growth factor-mediated invasion in human [r1.s1] non-small cell lung cancer cells. *J. Cell Sci.* DOI:  
368 [10.1242/jcs.130013](https://doi.org/10.1242/jcs.130013) (2013).
- 369 **25.** Roger, S., Besson, P. & Guennec, J.-Y. L. Influence of the whole-cell patch-clamp configuration on electrophysiological  
370 properties of the voltage-dependent sodium current expressed in MDA-MB-231 breast cancer cells. *Eur. Biophys. J.* **33**,  
371 274–279, DOI: [10.1007/s00249-003-0365-0](https://doi.org/10.1007/s00249-003-0365-0) (2003).
- 372 **26.** Pardo, L. A. & Stühmer, W. The roles of k channels in cancer. *Nat. Rev. Cancer* **14**, 39–48, DOI: [10.1038/nrc3635](https://doi.org/10.1038/nrc3635) (2013).

- 373 **27.** Cabello, M. *et al.* Extracellular electrophysiology in the prostate cancer cell model PC-3. *Sensors* **19**, 139, DOI:  
374 [10.3390/s19010139](https://doi.org/10.3390/s19010139) (2019).
- 375 **28.** Ribeiro, M. *et al.* Human breast cancer cells demonstrate electrical excitability. *Front. Neurosci.* **14**, DOI: [10.3389/fnins.](https://doi.org/10.3389/fnins.2020.00404)  
376 [2020.00404](https://doi.org/10.3389/fnins.2020.00404) (2020).
- 377 **29.** Yan, P. *et al.* Palette of fluorinated voltage-sensitive hemicyanine dyes. *Proc. Natl. Acad. Sci.* **109**, 20443–20448, DOI:  
378 [10.1073/pnas.1214850109](https://doi.org/10.1073/pnas.1214850109) (2012).
- 379 **30.** Acker, C. D., Yan, P. & Loew, L. M. Recent progress in optical voltage-sensor technology and applications to cardiac  
380 research: from single cells to whole hearts. *Prog. Biophys. Mol. Biol.* **154**, 3–10, DOI: [10.1016/j.pbiomolbio.2019.07.004](https://doi.org/10.1016/j.pbiomolbio.2019.07.004)  
381 (2020).
- 382 **31.** Lubba, C. H. *et al.* catch22: CAnonical time-series CHaracteristics. *Data Min. Knowl. Discov.* **33**, 1821–1852, DOI:  
383 [10.1007/s10618-019-00647-x](https://doi.org/10.1007/s10618-019-00647-x) (2019).
- 384 **32.** Okumura, K. *et al.* Optical measurement of neuronal activity in the developing cerebellum of zebrafish using voltage-  
385 sensitive dye imaging. *NeuroReport* **29**, 1349–1354, DOI: [10.1097/wnr.0000000000001113](https://doi.org/10.1097/wnr.0000000000001113) (2018).
- 386 **33.** Loew, L., Cohen, L., Salzberg, B., Obaid, A. & Bezanilla, F. Charge-shift probes of membrane potential. characterization  
387 of aminostyrylpyridinium dyes on the squid giant axon. *Biophys. J.* **47**, 71–77, DOI: [10.1016/s0006-3495\(85\)83878-9](https://doi.org/10.1016/s0006-3495(85)83878-9)  
388 (1985).
- 389 **34.** Miller, E. W. *et al.* Optically monitoring voltage in neurons by photo-induced electron transfer through molecular wires.  
390 *Proc. Natl. Acad. Sci.* **109**, 2114–2119, DOI: [10.1073/pnas.1120694109](https://doi.org/10.1073/pnas.1120694109) (2012).
- 391 **35.** Knöpfel, T. & Song, C. Optical voltage imaging in neurons: moving from technology development to practical tool. *Nat.*  
392 *Rev. Neurosci.* **20**, 719–727, DOI: [10.1038/s41583-019-0231-4](https://doi.org/10.1038/s41583-019-0231-4) (2019).
- 393 **36.** Abdelfattah, A. S. *et al.* Bright and photostable chemigenetic indicators for extended in vivo voltage imaging. *Science* **365**,  
394 699–704, DOI: [10.1126/science.aav6416](https://doi.org/10.1126/science.aav6416) (2019).
- 395 **37.** Yang, M. *et al.* Voltage-dependent activation of rac1 by na v 1.5 channels promotes cell migration. *J. Cell. Physiol.* **235**,  
396 3950–3972, DOI: [10.1002/jcp.29290](https://doi.org/10.1002/jcp.29290) (2019).
- 397 **38.** Rizaner, N. *et al.* Intracellular calcium oscillations in strongly metastatic human breast and prostate cancer cells: control  
398 by voltage-gated sodium channel activity. *Eur. Biophys. J.* **45**, 735–748, DOI: [10.1007/s00249-016-1170-x](https://doi.org/10.1007/s00249-016-1170-x) (2016).

- 399 **39.** Haren, N. *et al.* Intermediate conductance  $Ca^{2+}$  activated  $K^{+}$  channels are expressed and functional in breast adenocarcino-  
400 mas: correlation with tumour grade and metastasis status. *Histol. histopathology* (2010).
- 401 **40.** Lazzari-Dean, J. R., Gest, A. M. & Miller, E. W. Optical estimation of absolute membrane potential using fluorescence  
402 lifetime imaging. *eLife* **8**, DOI: [10.7554/elife.44522](https://doi.org/10.7554/elife.44522) (2019).
- 403 **41.** Lazzari-Dean, J. R. & Miller, E. W. Optical estimation of absolute membrane potential using one- and two-photon  
404 fluorescence lifetime imaging microscopy. *Bioelectricity* **3**, 197–203, DOI: [10.1089/bioe.2021.0007](https://doi.org/10.1089/bioe.2021.0007) (2021).
- 405 **42.** Brisson, L. *et al.* NaV1.5 enhances breast cancer cell invasiveness by increasing NHE1-dependent  $H^{+}$  efflux in caveolae.  
406 *Oncogene* **30**, 2070–2076, DOI: [10.1038/onc.2010.574](https://doi.org/10.1038/onc.2010.574) (2010).
- 407 **43.** Roger, S., Gillet, L., Guennec, J.-Y. L. & Besson, P. Voltage-gated sodium channels and cancer: is excitability their primary  
408 role? *Front. Pharmacol.* **6**, DOI: [10.3389/fphar.2015.00152](https://doi.org/10.3389/fphar.2015.00152) (2015).
- 409 **44.** Park, S.-H. *et al.* Determinants of ion-transporter cancer cell death. *Chem* **5**, 2079–2098, DOI: [10.1016/j.chempr.2019.05.](https://doi.org/10.1016/j.chempr.2019.05.001)  
410 [001](https://doi.org/10.1016/j.chempr.2019.05.001) (2019).
- 411 **45.** Das, V., Bhattacharya, S., Chikkaputtaiah, C., Hazra, S. & Pal, M. The basics of epithelial–mesenchymal transition  
412 (EMT): A study from a structure, dynamics, and functional perspective. *J. Cell. Physiol.* **234**, 14535–14555, DOI:  
413 [10.1002/jcp.28160](https://doi.org/10.1002/jcp.28160) (2019).
- 414 **46.** Edelstein, A. D. *et al.* Advanced methods of microscope control using manager software. *J. Biol. Methods* **1**, e10, DOI:  
415 [10.14440/jbm.2014.36](https://doi.org/10.14440/jbm.2014.36) (2014).
- 416 **47.** Harris, C. R. *et al.* Array programming with NumPy. *Nature* **585**, 357–362, DOI: [10.1038/s41586-020-2649-2](https://doi.org/10.1038/s41586-020-2649-2) (2020).
- 417 **48.** Virtanen, P. *et al.* SciPy 1.0: Fundamental Algorithms for Scientific Computing in Python. *Nat. Methods* **17**, 261–272,  
418 DOI: [10.1038/s41592-019-0686-2](https://doi.org/10.1038/s41592-019-0686-2) (2020).
- 419 **49.** van der Walt, S. *et al.* scikit-image: image processing in Python. *PeerJ* **2**, e453, DOI: [10.7717/peerj.453](https://doi.org/10.7717/peerj.453) (2014).
- 420 **50.** Pedregosa, F. *et al.* Scikit-learn: Machine learning in Python. *J. Mach. Learn. Res.* **12**, 2825–2830 (2011).
- 421 **51.** pandas development team, T. pandas-dev/pandas: Pandas, DOI: [10.5281/zenodo.3509134](https://doi.org/10.5281/zenodo.3509134) (2020).
- 422 **52.** Hunter, J. D. Matplotlib: A 2d graphics environment. *Comput. Sci. & Eng.* **9**, 90–95, DOI: [10.1109/MCSE.2007.55](https://doi.org/10.1109/MCSE.2007.55) (2007).
- 423 **53.** Stringer, C., Wang, T., Michaelos, M. & Pachitariu, M. Cellpose: a generalist algorithm for cellular segmentation. *Nat.*  
424 *Methods* **18**, 100–106, DOI: [10.1038/s41592-020-01018-x](https://doi.org/10.1038/s41592-020-01018-x) (2020).



425 **54.** Rousseeuw, P. J. Silhouettes: A graphical aid to the interpretation and validation of cluster analysis. *J. Comput. Appl. Math.*  
426 **20**, 53–65, DOI: [10.1016/0377-0427\(87\)90125-7](https://doi.org/10.1016/0377-0427(87)90125-7) (1987).

## 427 **Acknowledgements**

428 The authors would like to thank Dr. Julia Gallinaro for her advice on the quantification of synchrony within the time courses.  
429 This work was supported by a Pump-prime Award from the Integrated Biological Imaging Network (IBIN3AF), the Royal  
430 Academy of Engineering under the RAEng Research Fellowships scheme (RF1415/14/26), the Biotechnology and Biology  
431 Research Council (BB/R009007/1), a Wellcome Trust Seed Award (Grant No. 201964/Z/16/Z), the Engineering and Physical  
432 Sciences Research Council (Grant No. EP/L016737/1 to Imperial College), and by a Cancer Research UK and Stand Up to  
433 Cancer UK Programme Foundation Award to CB (C37275/1A20146).

## 434 **Author contributions statement**

435 PQ devised the image acquisition system and methods with the guidance from CDA and AJF. PQ, MBAD, CB, and AJF  
436 designed the experiments. PQ performed the experiments, analysed the images, and designed and performed the event based  
437 analysis. MAG cultured the MCF-10A cells. YS developed the Cellular DES Pipeline with the guidance of CB, MBAD, AJF,  
438 and PQ. YS performed the feature-based analysis with assistance from PQ. PQ, YS, MAG, CB, MBAD, and AJF wrote the  
439 manuscript. All authors reviewed the manuscript.

## 440 **Additional information**

### 441 **Competing interests**

442 CDA is an owner and employee at Potentiometric Probes LLC, which develops and sells voltage-sensitive dyes. MBAD is  
443 involved in a small biotech company developing ion channel modulators as anti-cancer drugs.

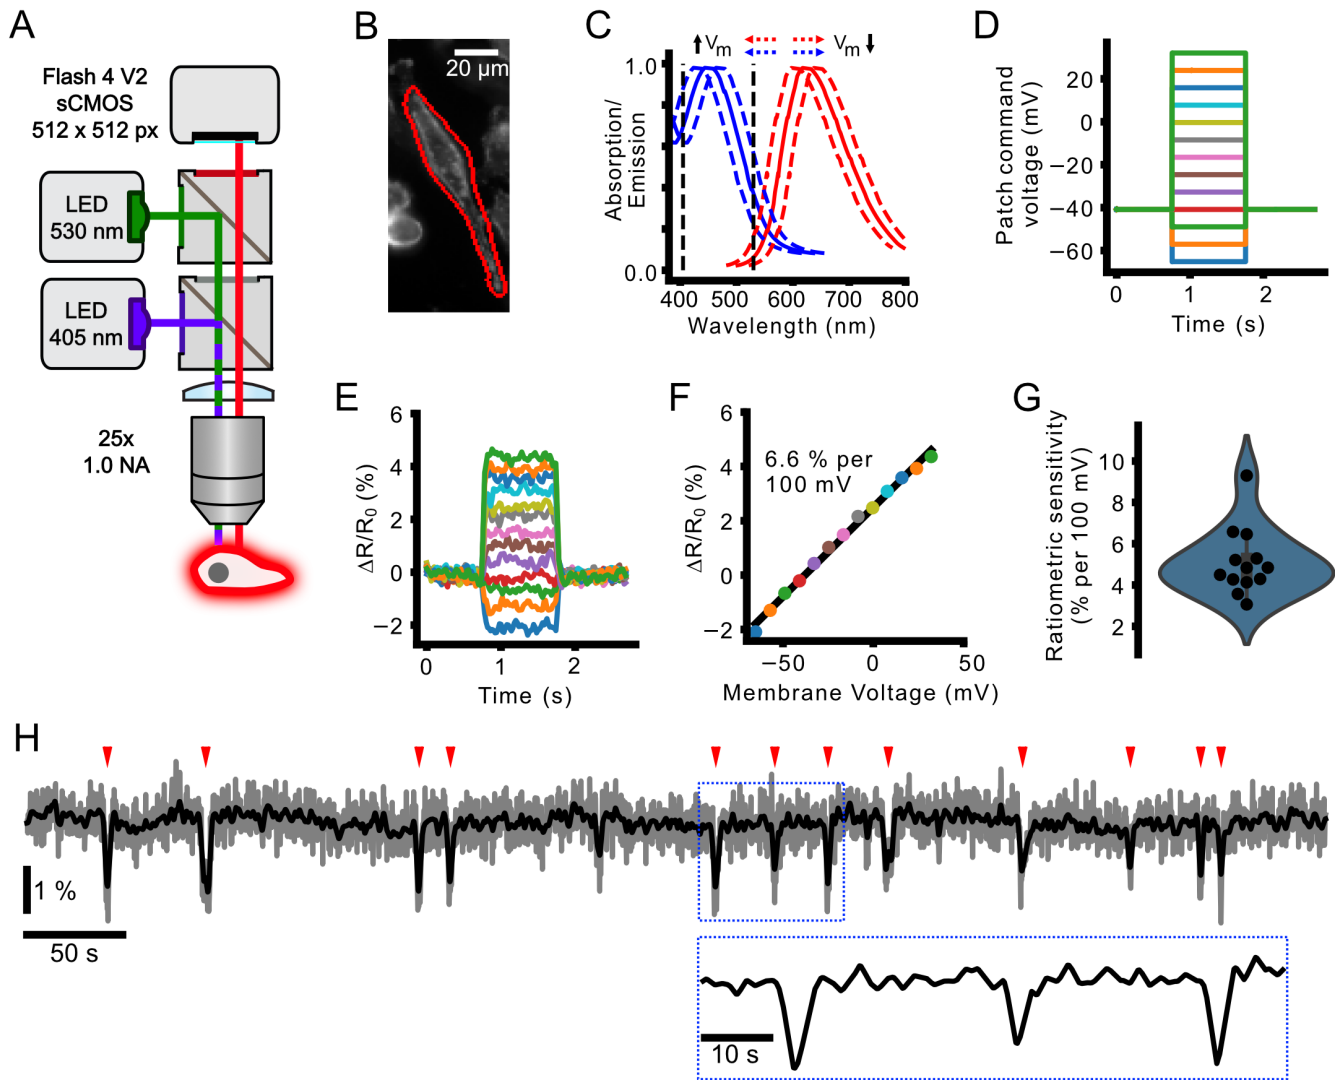

**Figure 1.** Electrochromic imaging of MDA-MB-231 cells with voltage dye di-4-AN(F)EP(F)PTEA. (A) Schematic of the widefield epifluorescence imaging system with two-color excitation. (B) MDA-MB-231 cell stained with di-4-AN(F)EP(F)PTEA with simultaneous voltage clamp (C) The blue and red lines show di-4-AN(F)EP(F)PTEA's excitation and emission spectra<sup>29</sup>, respectively. Fluorescence is excited by blue and green LEDs on opposite sides of the excitation maximum (black vertical dashed lines). Decreasing or increasing  $V_m$  causes the excitation spectra to shift right or left, respectively. Decreasing  $V_m$  therefore causes reduced emission in response to blue channel excitation, and increased fluorescence with green channel excitation and vice versa for increasing  $V_m$ . (D) Waveforms commanding the MDA-MB-231 whole-cell voltage clamp for calibration of the ratio of blue- to green-excited fluorescence with respect to the baseline ( $\Delta R/R_0$ ). (E) Recorded  $\Delta R/R_0$  signal in response to the injected  $V_m$  waveforms. (F) Average  $\Delta R/R_0$  change with membrane voltage change and a linear fit to the data indicating the imaging sensitivity (% change in ratio per 100 mV membrane voltage change). (G) Measured sensitivities for different patched cells with a gaussian kernel estimate (blue envelope). (H) Example time course of a spontaneously active MDA-MB-231 cell displaying typically observed transient  $V_m$  hyperpolarisations (indicated by red ticks). Grey, unfiltered time course, black, gaussian filtered time course, sigma = 3 sampling points (0.6 s).

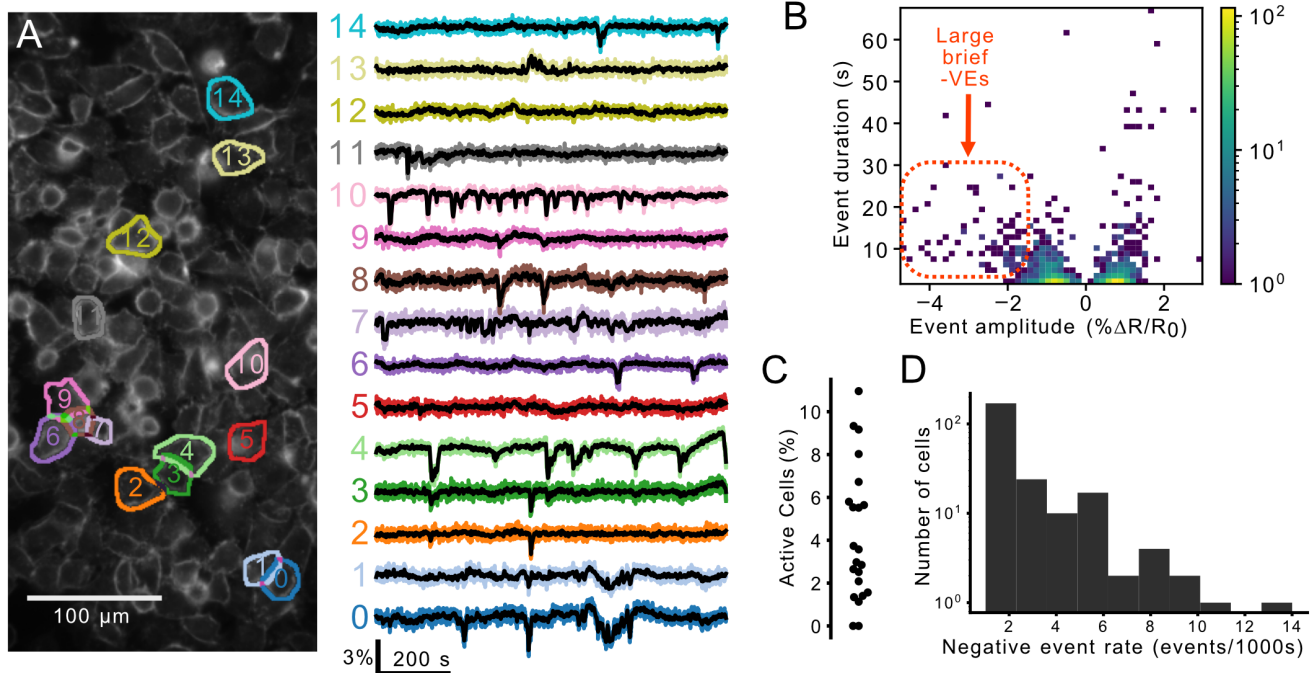

**Figure 2.** A subset of MDA-MB-231 cells exhibit  $V_m$  fluctuations (A) The ratio of Di-4-AN(F)EP(F)PTEA fluorescence ( $\Delta R/R_0$ ) was imaged at 5 frames/second in cultured MDA-MB-231 cells. The  $\Delta R/R_0$  time series extracted from the segmented cells (right) reveals heterogeneous  $V_m$  fluctuations consisting primarily of transient hyperpolarizations. (B) A log-scaled 2D histogram of event amplitude and duration. These fluctuations vary in their polarity (positive-going, “+VE” vs. negative-going “-VE”), amplitude, and duration. Large amplitude fluctuations were typically hyperpolarising (-VE amplitude) and short in duration. (C) Proportion of active cells for 20 technical replicates displaying the high variability in the proportion of active cells. (D) A log-scaled histogram of the mean -VE rate for all active cells (at least one -VE observed) showing the long-tailed distribution with a few highly active cells.

### A Time-series Acquisition and Selection

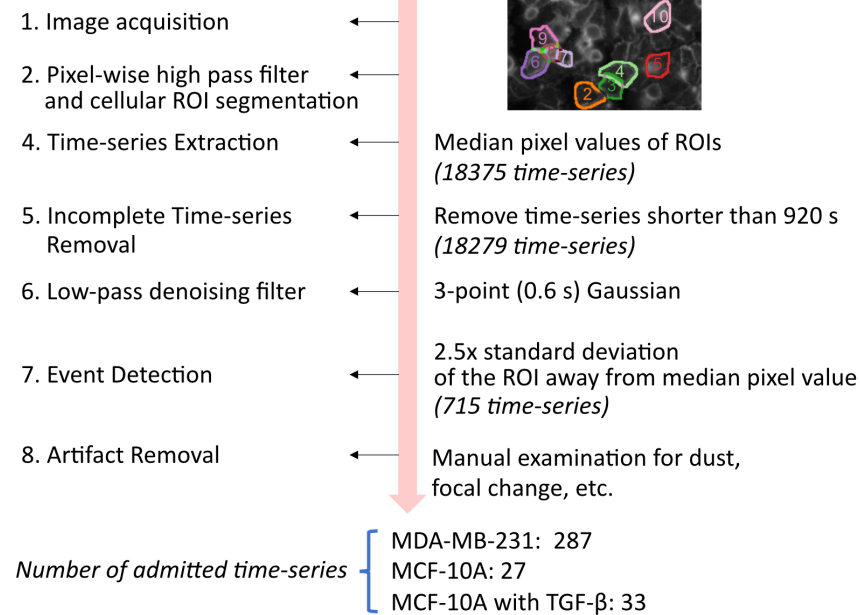

### B Cellular $V_m$ ( $\% \Delta R/R_0$ ) time-series

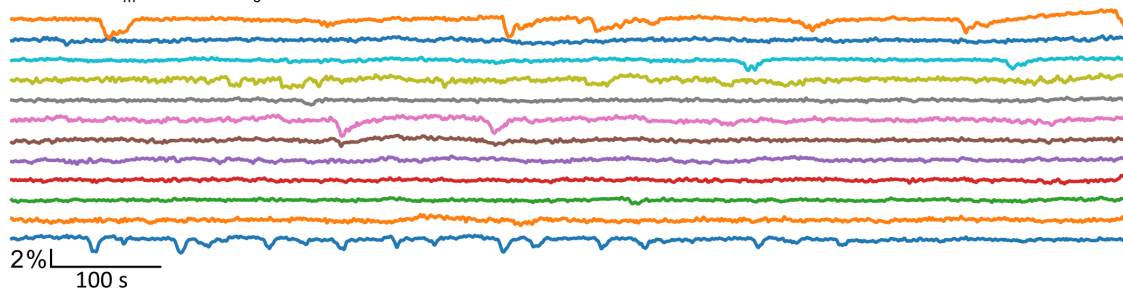

### C Feature Extraction and Normalization

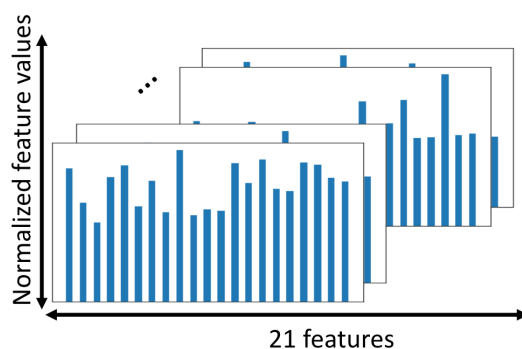

### D Silhouette Coefficient

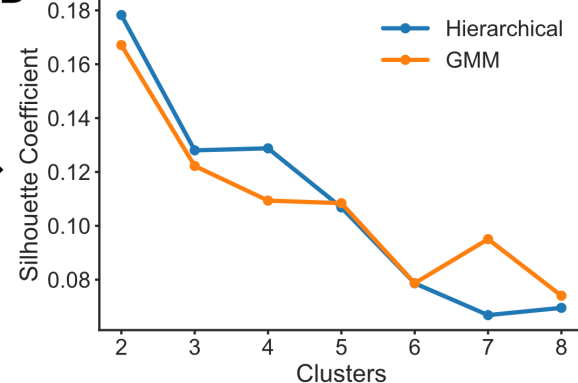

**Figure 3.** The Dynamic Electrical Signature (DES) of MDA-MB-231 cells clustered into four classes (A) Time series were admitted to the unsupervised machine learning clustering pipeline if their temporally filtered  $\Delta R/R_0$  exhibited fluctuations  $> 2.5x$  of their within-ROI pixel standard deviation from the median pixel value, and if also free of imaging artefacts including floating dust, mechanical vibration and illumination edge effects. (B) Visual inspection of each cell's time series finalized admission to the Cellular DES Pipeline. (C) 22 features relevant to time series temporal patterns were extracted from each time series using the Catch-22 algorithm<sup>31</sup> and normalized with a Box Cox transformation relative to their values. (D) The silhouette coefficients for different cluster numbers were generated through hierarchical clustering (blue) or Gaussian Mixture Modeling (GMM, orange) on the normalized features.

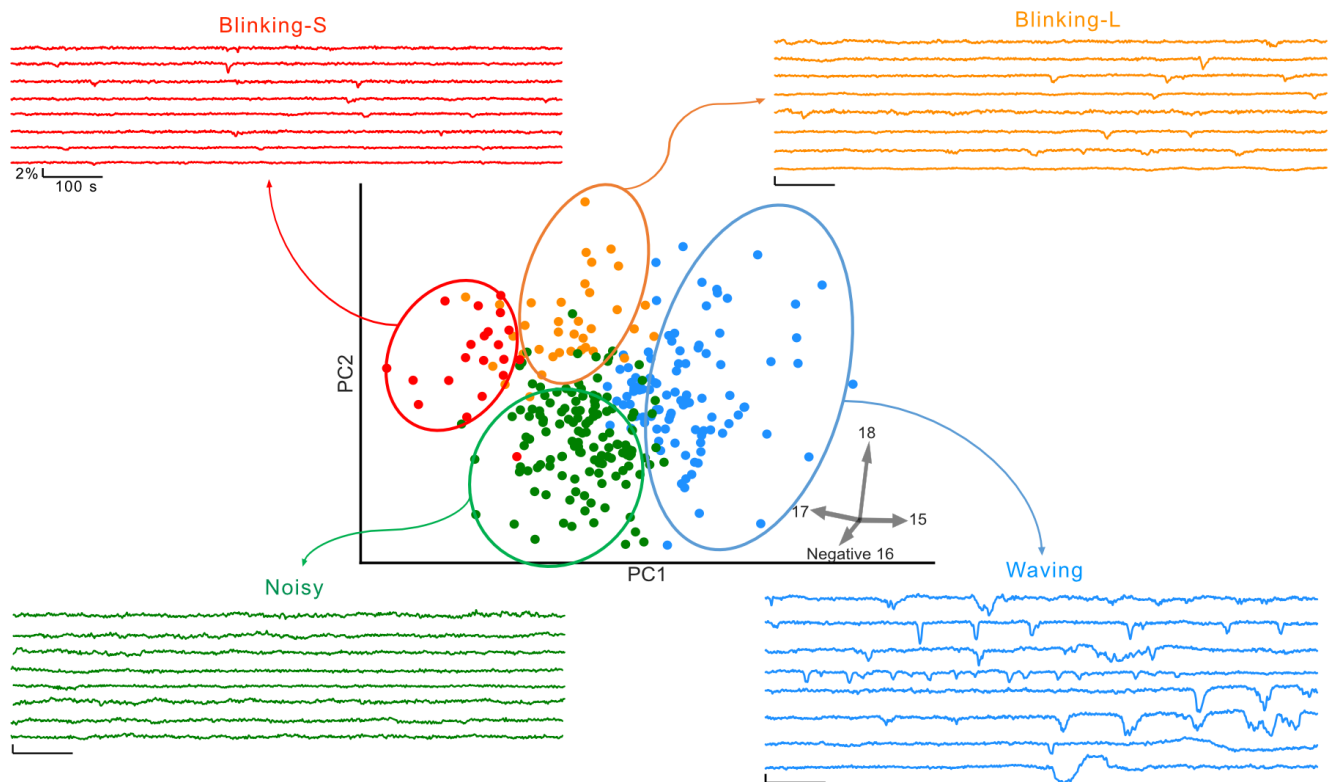

**Figure 4.** Exemplar time series for each DES class. Representative time series were selected by sorting the values of the feature's pointing in the direction of each type in 2D PC space.

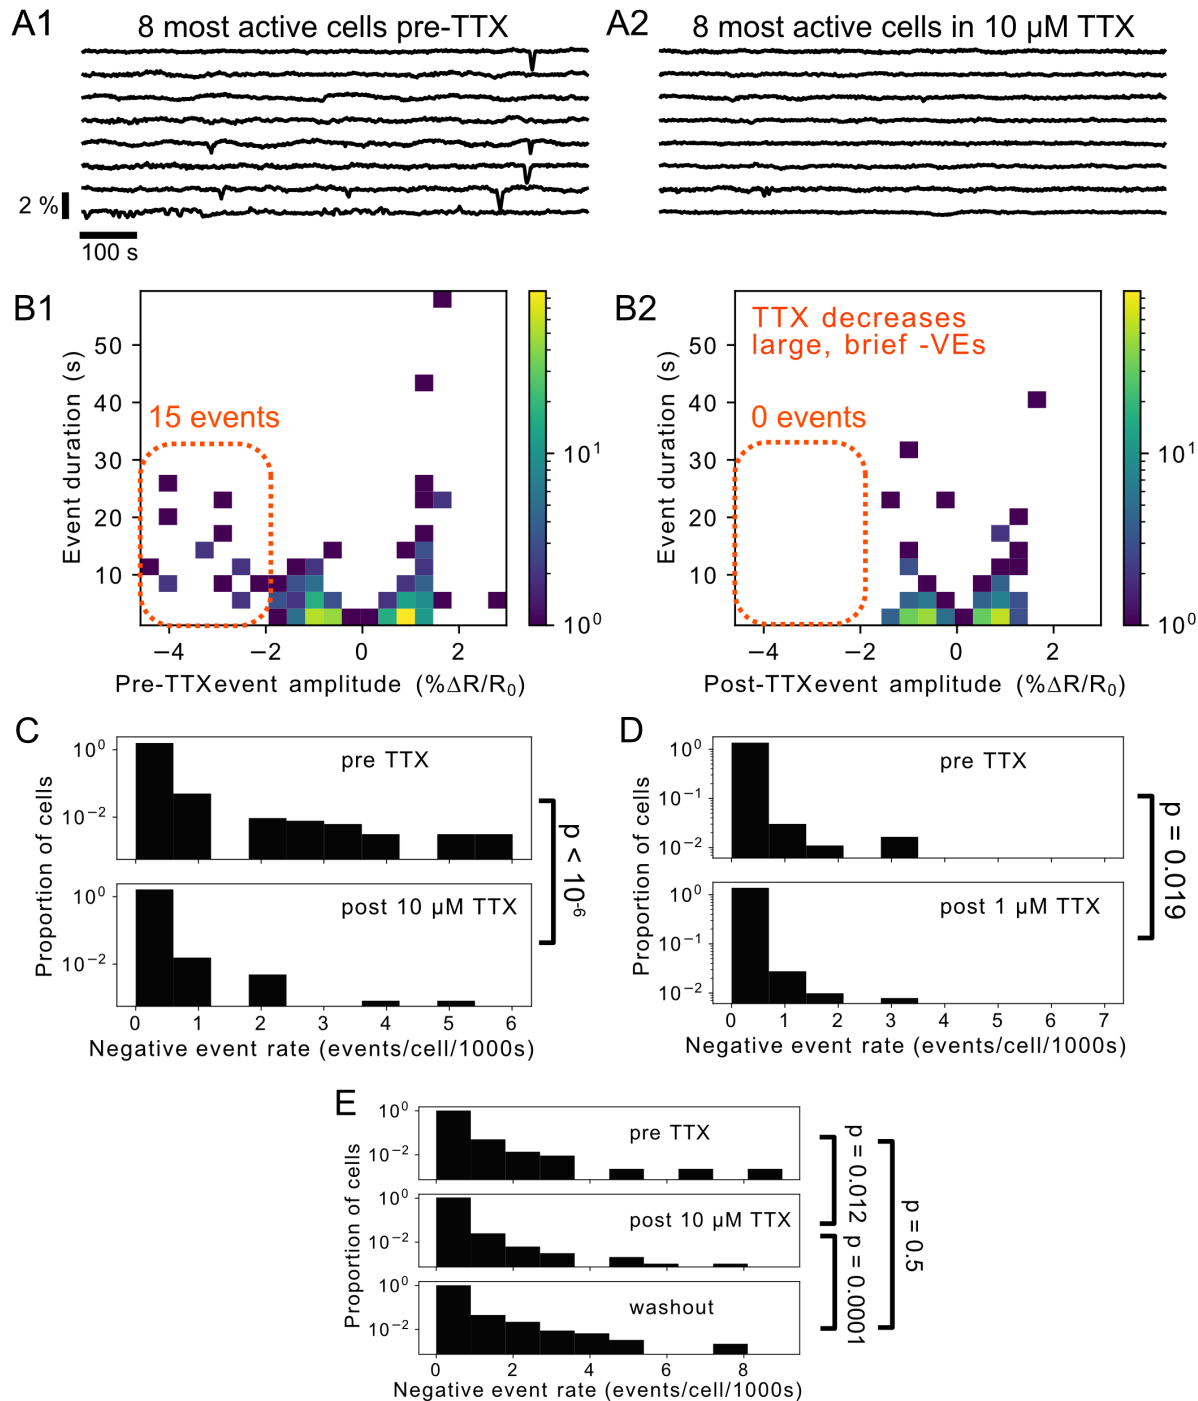

**Figure 5.** TTX decreased  $V_m$  fluctuations in MDA-MB-231 cells. (A1,2) Example  $V_m$  time courses from the 8 most active cells in acquisitions before (A1) and with (A2) 10  $\mu\text{M}$  TTX. (B1, B2) Log-scaled 2D histograms of detected events before (B1) and with (B2) 10  $\mu\text{M}$  TTX. TTX eradicates virtually all large, hyperpolarizing events (-VEs, dashed orange outline). (C) Log scaled histograms of the -VE event rate per cell for pre- and post- application of 10  $\mu\text{M}$  TTX. The reduction in the mean from  $9.5 \times 10^{-5}$  events/cell/s to  $1.97 \times 10^{-5}$  events/cell/s ( $\sim 4x$  decrease) is significant with  $p < 10^{-6}$ . (D) The effect of TTX is dose dependent: 1  $\mu\text{M}$  TTX reduced the mean event rate by a lesser factor of  $\sim 2x$  from  $1.04 \times 10^{-4}$  events/cell/s to  $4.99 \times 10^{-5}$  events/cell/s ( $p = 0.019$ ). (E) The effect of TTX is reversible. The effects of TTX can be reversed by washing out the toxin, significantly increasing the -VE rate.

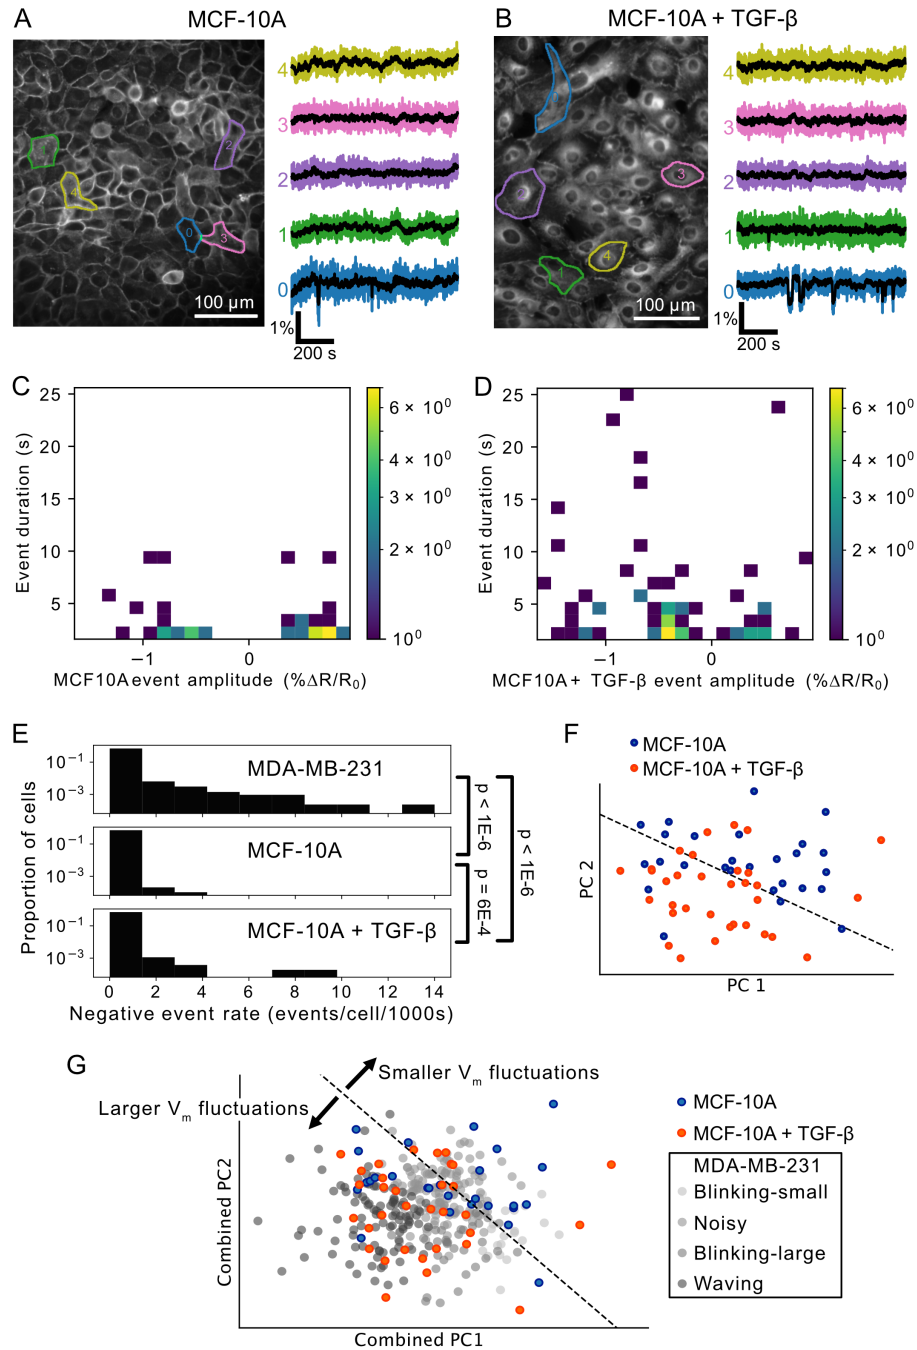

**Figure 6.** Non-cancerous MCF10A cells exhibit minimal  $V_m$  fluctuations which are upregulated by TGF- $\beta$ . (A & B) Images and cellular  $V_m$  time series extracted from MCF-10A cells (A) and MCF-10A treated with TGF- $\beta$  (B). (C & D) 2D log-scaled amplitude-duration histograms of (C) MCF10A and (D) MCF10A+TGF- $\beta$  events. Both MCF-10A and MCF10A+TGF- $\beta$  exhibit significantly lower event rates than MDA-MB-231 cells. (E) Cell-level comparison of the negative event rate. Incubation of cells with TGF- $\beta$  significantly increases the event rate. (F) Incubation of MCF-10A in TGF- $\beta$  alters the cellular-level DES. The treated and untreated cells locate to different areas of 2D PC space, indicating DES differentiation between these groups. The black dashed line is the best linear separator calculated on the TGF- $\beta$  treated (orange) and untreated (blue) groups. (G) Unlike the untreated MCF-10A which exhibited  $V_m$  fluctuations of varying amplitudes, TGF- $\beta$  treatment biased active MCF-10A  $V_m$  fluctuations such that they localized near the large-amplitude “waving” MDA-MB-231 class in combined PC space.

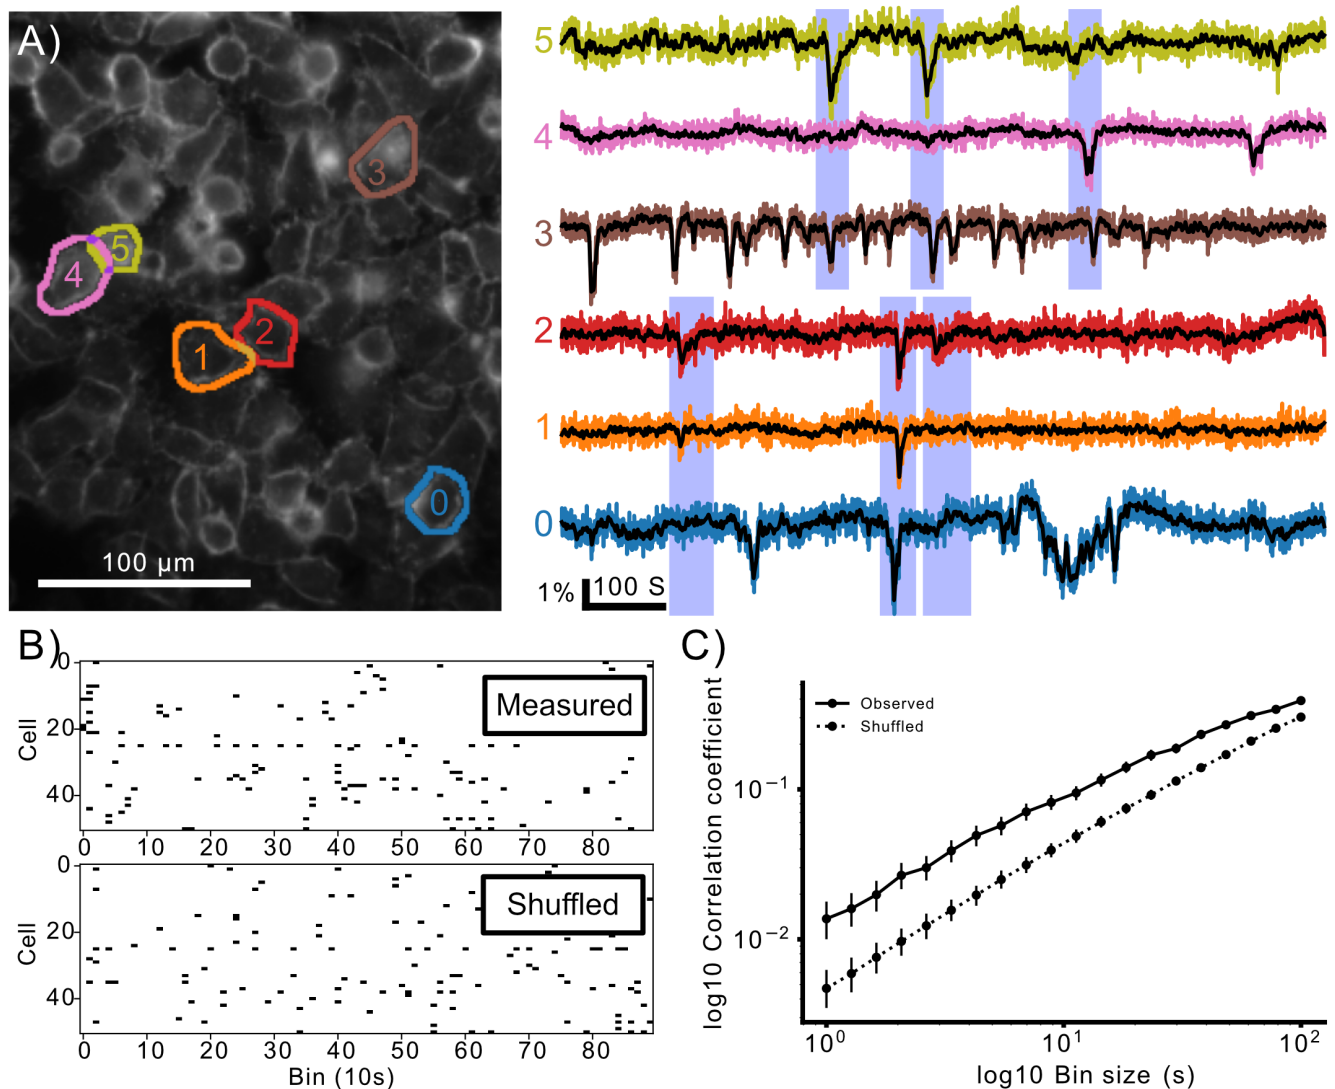

**Figure 7.** Transient activity is temporally correlated in MDA-MB-231 cells. (A) Example of temporally correlated cellular time courses from one FOV. Spatially separated cells (0,1,2) and (3,4,5) display synchronised hyperpolarisations. Importantly these synchronisations occur in different subsets of the groups and in spatially separated cells, indicating the synchronisation is not simply due to cross-talk in the imaging. (B) Quantification of correlation. Events are put into time bins, generating cellular event rasters. The average pairwise correlation between cells in a recording was calculated. A null hypothesis of zero correlation with the same temporal statistics was generated by temporally shuffling each cell's event raster to obtain an estimate of the expected level of correlation if there were no cellular synchronisation. (C) The observed pairwise correlations are significantly higher in the observed data than shuffled data for all bin sizes, indicating the cellular activity is temporally correlated. The points plot the mean, and bars indicate the 95% confidence interval for the measured and shuffled case for each bin size.



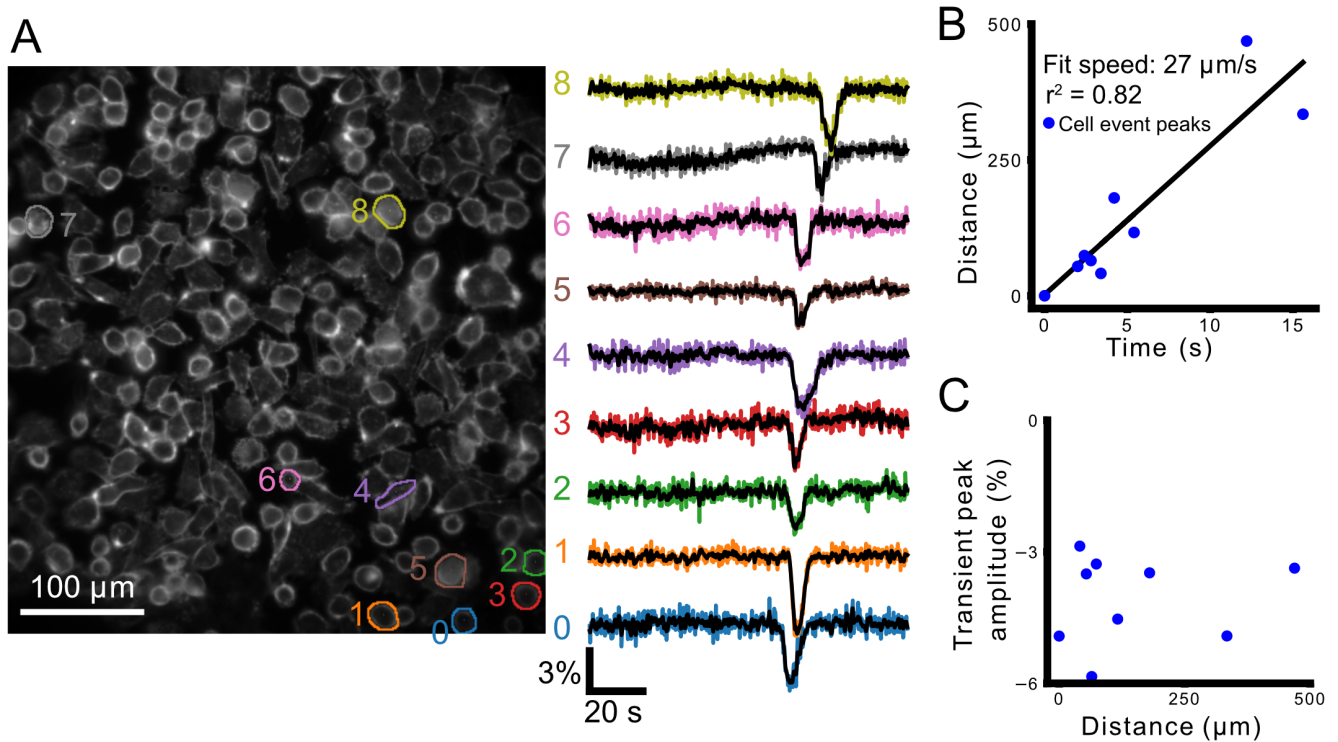

**Figure 8.** A wave of transient hyperpolarizations propagates across the FOV. (A) shows cellular ROIs and their color-corresponding  $\Delta R/R_0$  time series (right). (B) plots distance from the first cell as a function of time at maximum hyperpolarization. The line fit to this relationship shows a propagation speed of 27  $\mu\text{m/s}$ . (C) plots the peak transient amplitude ( $\% \Delta R/R_0$ ) as a function of distance from the cell first showing the transient hyperpolarization.
